# Supplementary material for: Increased family psychosocial focus during children’s developmental assessments: a study of parents’ views
Source: Springer Nature journal article supplement (doi:10.1186/s12887-024-04800-4), 2024-05-15
Supplement: MOESM1 [file 27095266]

## Additional file 1: topic guide

### About parents' experience of the developmental assessments

This topic guide was translated from Danish to English after interviews were conducted.

|                                 |                                                                                                                                                                                                                                                                                                                                                                                                                                                                                                                                                                                                                                                                    |
|---------------------------------|--------------------------------------------------------------------------------------------------------------------------------------------------------------------------------------------------------------------------------------------------------------------------------------------------------------------------------------------------------------------------------------------------------------------------------------------------------------------------------------------------------------------------------------------------------------------------------------------------------------------------------------------------------------------|
| <b>Introduction</b>             | <ul style="list-style-type: none"><li>• Give information about the study.</li><li>• Introduction of the interviewer and her part in the study.</li><li>• Get oral consent to participation, recording and storage of data.</li></ul>                                                                                                                                                                                                                                                                                                                                                                                                                               |
| <b>Background</b>               | <ul style="list-style-type: none"><li>• Would you tell me a little bit about you and your family? (should cover age, education, job, family constellation)</li><li>• How were you introduced to Project Family Wellbeing?</li><li>• What thoughts did you initially have about the project when it was introduced to you?</li><br/><li>• Who conducted your child's developmental assessments?</li><li>• How much contact did you have with him/her/them prior to the developmental assessments?</li><li>• How is your overall relationship with the clinician(s) who conducted the developmental assessments?</li></ul>                                           |
| <b>Developmental assessment</b> | <p>Try to think back to a specific child developmental assessment you have been to with your child that is part of the Family Wellbeing Project.</p> <ul style="list-style-type: none"><li>• Which developmental assessment are you thinking of?</li></ul>                                                                                                                                                                                                                                                                                                                                                                                                         |
| <b>Expectations</b>             | <ul style="list-style-type: none"><li>• Please try to describe your expectations prior to the developmental assessment.<ul style="list-style-type: none"><li>• If older siblings: were these expectations different from when you were at your older child's developmental assessments?</li></ul></li></ul>                                                                                                                                                                                                                                                                                                                                                        |
| <b>Experience</b>               | <ul style="list-style-type: none"><li>• Please try to describe how you experienced the developmental assessment from beginning to end.</li><li>• What was different, if anything, compared to your expectations?<ul style="list-style-type: none"><li>• If older siblings: was there anything different compared to developmental assessments of your older child?</li></ul></li><li>• Was there anything in particular which the clinician helped you with?<ul style="list-style-type: none"><li>• If yes: would you care to elaborate?</li></ul></li><li>• Did you experience anything positive in the way the developmental assessment was conducted?</li></ul> |

|                            |                                                                                                                                                                                                                                                                                                                                                                                                                                                                                                                                                                                                                                                                                                                                                                                                                                                                                                                                                                                                                                                                                                                                         |
|----------------------------|-----------------------------------------------------------------------------------------------------------------------------------------------------------------------------------------------------------------------------------------------------------------------------------------------------------------------------------------------------------------------------------------------------------------------------------------------------------------------------------------------------------------------------------------------------------------------------------------------------------------------------------------------------------------------------------------------------------------------------------------------------------------------------------------------------------------------------------------------------------------------------------------------------------------------------------------------------------------------------------------------------------------------------------------------------------------------------------------------------------------------------------------|
|                            | <ul style="list-style-type: none"> <li>• Did you experience anything negative in the way the developmental assessment was conducted?</li> <li>• Did anything feel uncomfortable or to be overstepping your boundaries? <ul style="list-style-type: none"> <li>• If yes: would you care to elaborate?</li> </ul> </li> <li>• Could anything have been handled better? <ul style="list-style-type: none"> <li>• If yes: would you care to elaborate?</li> </ul> </li> <li>• What do you think about the questions that the clinician asked?</li> <li>• Was there anything else you would have liked to discuss during the developmental assessment? <ul style="list-style-type: none"> <li>• If yes: would you care to elaborate?</li> </ul> </li> </ul>                                                                                                                                                                                                                                                                                                                                                                                  |
| <b>Health Belief Model</b> | <ul style="list-style-type: none"> <li>• What do you find appropriate to talk to [clinician's name] about?</li> <li>• What do you find appropriate to discuss at the developmental assessment?</li> <li>• Are there any topics you would not feel like discussing at the developmental assessment? <ul style="list-style-type: none"> <li>• If yes: would you care to elaborate?</li> </ul> </li> <li>• Would you want to discuss concerns related to your mood, relationship with your partner or other family member, your finances or accommodation? <ul style="list-style-type: none"> <li>• Do you find these topics relevant to the developmental assessment?</li> </ul> </li> <li>• Do you think mental or social aspects in the family affect a young child? <ul style="list-style-type: none"> <li>• If yes: would you care to elaborate?</li> </ul> </li> <li>• What could encourage you to open up about personal aspects?</li> <li>• What would inhibit you from discussing personal aspects?</li> <li>• What kind of help do you think the clinician can provide if you bring up that type of personal problem?</li> </ul> |
| <b>Closure</b>             | <ul style="list-style-type: none"> <li>• What is your overall thought on clinicians addressing mental and social aspects at the developmental assessment?</li> <li>• Is there anything you would like to add towards the end?</li> </ul> <p>Thank you so much for your time and your contribution.</p>                                                                                                                                                                                                                                                                                                                                                                                                                                                                                                                                                                                                                                                                                                                                                                                                                                  |
