# Supplementary material for: Increased family psychosocial focus during children’s developmental assessments: a study of parents’ views
Source: Springer Nature journal article supplement (doi:10.1186/s12887-024-04800-4), 2024-05-15
Supplement: MOESM2 [file 27095266]

## Additional file 2: example of a structured child record

### 5 week preventive child health examination

Date: Birth date: Examination by: Doctor  Midwife  Nurse

Mother's name: Child's name:

Who is accompanies the child:

#### The birth

Birth weight: ..... Born in week: .....  
Birth complications: yes  no  Comment: .....  
Neonatal complications: yes  no  Comment: .....  
Conversation with the parents about the pregnancy, birth and new-born period: yes  no   
Comment: .....

#### Family and social conditions

Parents living together: yes  no  Comment: .....  
Parents healthy: yes  no  Comment: .....  
Conversation about mental well-being: yes  no   
The mother, problems: yes  no  Comment: .....  
The father, problems: yes  no  Comment: .....  
No. siblings: ..... , healthy yes  no  Comment: .....  
Conversation about social conditions: (parents' jobs, economy, accommodation, social benefits) yes  no   
Comment: .....  
Relationships with grandparents: yes  no  Elaborate: .....  
.....  
Conversation about network: (relation to siblings, family, friends, colleagues, neighbours) yes  no   
Comment: .....  
.....

#### Current

##### Regulation of the child:

Problems with breastfeeding: yes  no  Comment: .....  
Problems with sleep: yes  no  Comment: .....  
Problems with circadian rhythm: yes  no  Comment: .....  
Problems with crying: yes  no  Comment: .....  
Illness/health issues since birth: yes  no  Comment: .....  
Do the mother/parents experience problems in their care of the child?

yes  no  Comment: .....

Contact with the health nurse: yes  no  Comment: .....

**Health examination**

Head measurement: ..... Weight: ..... Length: ..... Weight gain pr. Week: .....  
(100-400 g +/- for both boys and girls)

**Observation of collaboration, autonomy and responsiveness:**

**Mother-child:**

| Did you observe? | Yes /no | Positive | Negative |
|------------------|---------|----------|----------|
| Cooperation      |         |          |          |
| Autonomy         |         |          |          |
| Responsiveness   |         |          |          |

Comments: .....

.....

**Father-child (or other companion):**

| Did you observe? | Yes /no | Positive | Negative |
|------------------|---------|----------|----------|
| Cooperation      |         |          |          |
| Autonomy         |         |          |          |
| Responsiveness   |         |          |          |

Comments: .....

.....

Was something worrying? .....

**Physical examination:**

Normal interaction with the child: yes  no  Comment: .....  
(The child listens and fixates its eyes briefly) .....

Overall normal assessment: yes  no  Comment: .....  
(Casual, comfortable with calm, symmetrical movements.  
Reflexes, tonus. Lifting the head from abdominal position. ....  
Crying with variation)

Normal eye pupils, red eye reflex: yes  no  Comment: .....

Normal skull, mouth, skin, neck: yes  no  Comment: .....

Normal heart/lung stethoscope: yes  no  Comment: .....

Normal hip joints: yes  no  Comment: .....

Normal genitals: yes  no  Comment: .....

Additional info: .....

**Overall assessment**

**Short resume of important findings:**

.....  
.....  
.....

**Follow up before next preventive child health examination:**

Consultation-control  Home visiting nurse  Specialist/hospital   
Social services  Other effort  No extra effort needed

Comment: .....

.....
