# Supplementary material for: Increased family psychosocial focus during children’s developmental assessments: a study of parents’ views
Source: Springer Nature journal article supplement (doi:10.1186/s12887-024-04800-4), 2024-05-15

## Additional file 3: coding tree

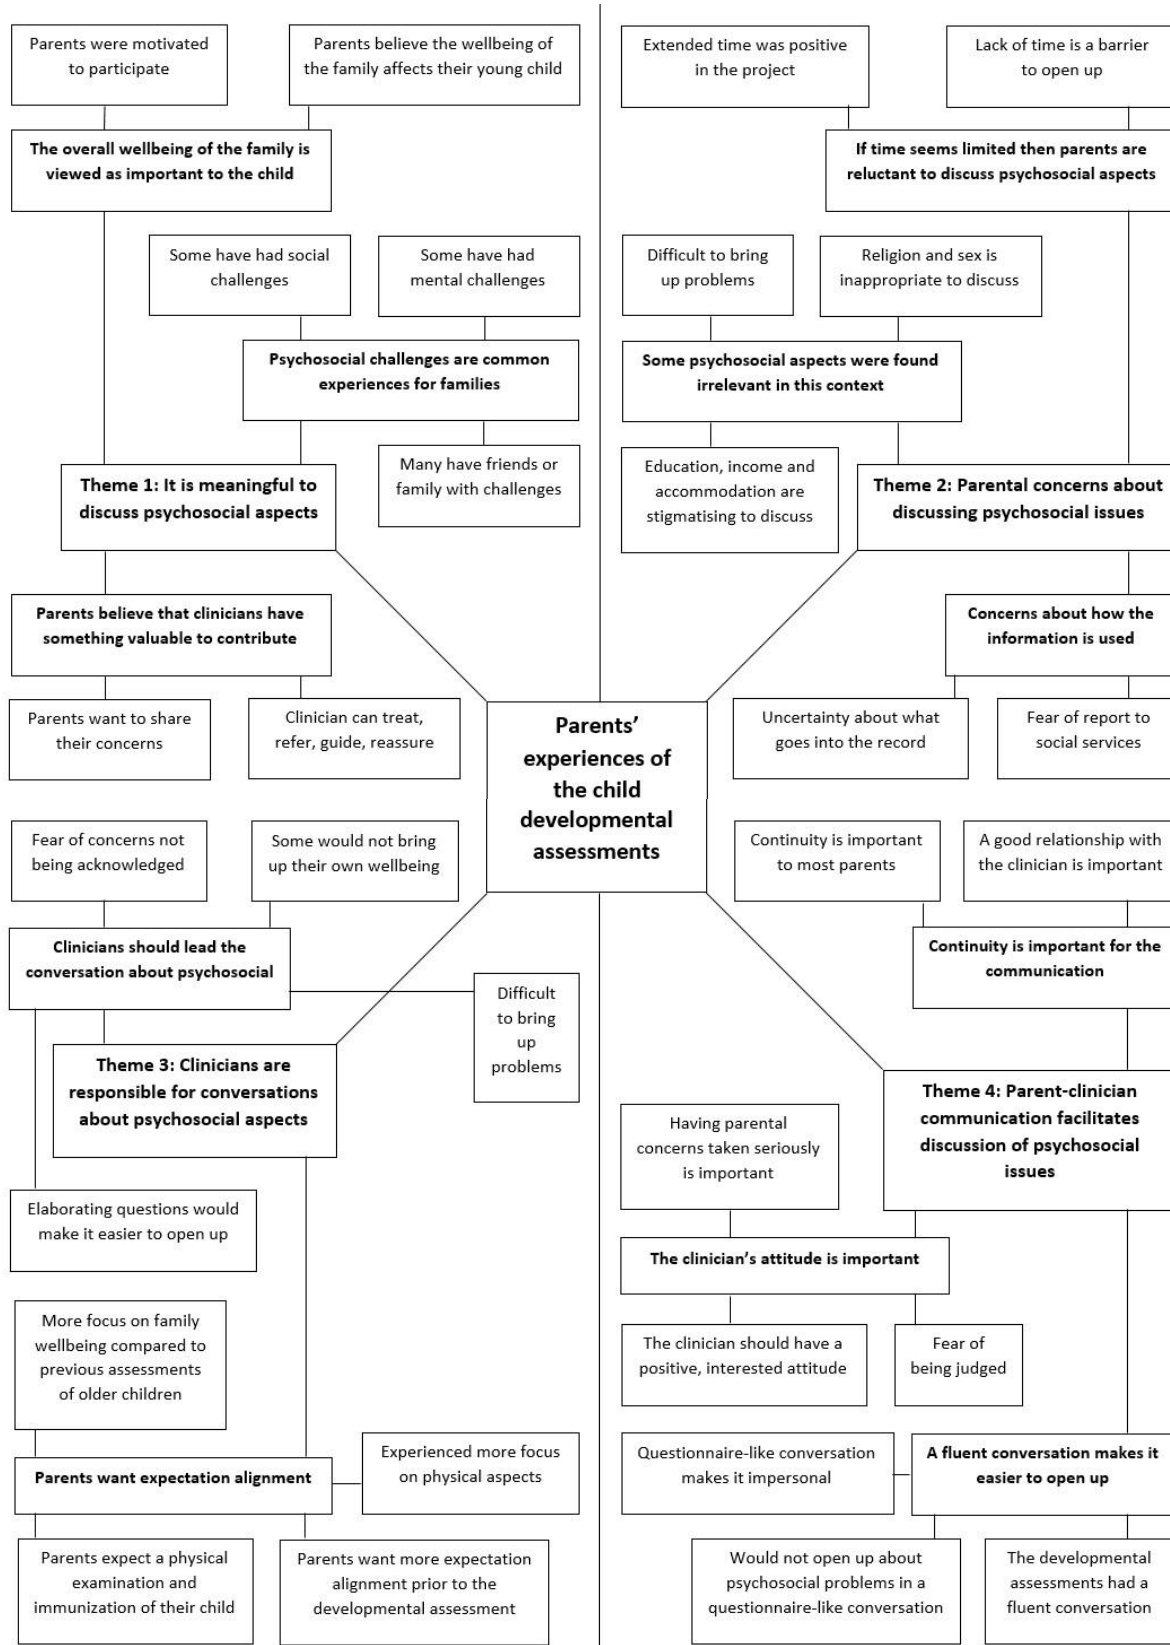

Supplement: MOESM3 [file 27095266]
